# Supplementary material for: An In Vitro Evaluation of the Capacity of Local Tanzanian Crude Clay and Ash-Based Materials in Binding Aflatoxins in Solution
Source: PubMed Central journal article supplement (PMC6316085; doi:10.3390/toxins10120510), 2018-12-03
Supplement: toxins-10-00510-s001.pdf [file toxins-10-00510-s001.pdf]

# Supplementary Materials: An In Vitro Evaluation of the Capacity of Local Tanzanian Crude Clay and Ash-Based Materials in Binding Aflatoxins in Solution

Emmanuel M. Ayo, Athanasia Matemu, Germana H. Laswai and Martin E. Kimanya

**Table S1.** Data of the in-vitro test of Tanzanian local binding materials.

| 1  | 2  | 3     | 4     | 5     | 6     | 7     | 8     | 9     | 10    | 11    | 12    | 13    | 14    | 15    | 16    | 17    | 18    | 19    | 20   |
|----|----|-------|-------|-------|-------|-------|-------|-------|-------|-------|-------|-------|-------|-------|-------|-------|-------|-------|------|
| AC | G2 | 4.140 | 0.032 | 4.108 | 2.773 | 2.862 | 2.798 | 0.024 | 2.749 | 2.838 | 2.774 | 1.359 | 1.270 | 1.335 | 33.08 | 30.91 | 32.49 | 32.16 | 1.12 |
|    | G1 | 2.722 | 0.045 | 2.677 | 0.010 | 0.010 | 0.010 | 0.007 | 0.002 | 0.002 | 0.002 | 2.675 | 2.675 | 2.675 | 99.91 | 99.91 | 99.91 | 99.91 | 0.00 |
|    | B2 | 4.134 | 0.073 | 4.061 | 1.668 | 1.678 | 1.675 | 0.072 | 1.596 | 1.606 | 1.603 | 2.465 | 2.456 | 2.459 | 60.69 | 60.47 | 60.54 | 60.57 | 0.12 |
|    | B1 | 2.975 | 0.295 | 2.680 | 0.077 | 0.106 | 0.077 | 0.029 | 0.047 | 0.076 | 0.047 | 2.633 | 2.604 | 2.633 | 98.24 | 97.16 | 98.24 | 97.88 | 0.62 |
| KC | G2 | 4.140 | 0.032 | 4.108 | 3.543 | 3.607 | 3.497 | 0.035 | 3.508 | 3.572 | 3.462 | 0.600 | 0.536 | 0.646 | 14.61 | 13.04 | 15.72 | 14.46 | 1.35 |
|    | G1 | 2.722 | 0.045 | 2.677 | 0.147 | 0.147 | 0.147 | 0.041 | 0.106 | 0.106 | 0.106 | 2.571 | 2.571 | 2.571 | 96.06 | 96.06 | 96.06 | 96.06 | 0.00 |
|    | B2 | 4.134 | 0.073 | 4.061 | 2.497 | 2.508 | 2.501 | 0.071 | 2.426 | 2.437 | 2.430 | 1.635 | 1.625 | 1.631 | 40.25 | 40.00 | 40.16 | 40.14 | 0.13 |
|    | B1 | 2.975 | 0.295 | 2.680 | 0.153 | 0.153 | 0.153 | 0.030 | 0.123 | 0.123 | 0.123 | 2.557 | 2.557 | 2.557 | 95.40 | 95.40 | 95.40 | 95.40 | 0.00 |
| CC | G2 | 4.140 | 0.032 | 4.108 | 3.478 | 3.469 | 3.401 | 0.052 | 3.426 | 3.417 | 3.349 | 0.683 | 0.692 | 0.759 | 16.61 | 16.83 | 18.47 | 17.31 | 1.01 |
|    | G1 | 2.722 | 0.045 | 2.677 | 1.911 | 1.909 | 1.851 | 0.050 | 1.861 | 1.859 | 1.801 | 0.816 | 0.818 | 0.876 | 30.48 | 30.55 | 32.71 | 31.25 | 1.27 |
|    | B2 | 4.134 | 0.073 | 4.061 | 3.611 | 3.494 | 3.540 | 0.072 | 3.539 | 3.422 | 3.468 | 0.523 | 0.640 | 0.594 | 12.87 | 15.75 | 14.61 | 14.41 | 1.45 |
|    | B1 | 2.975 | 0.295 | 2.680 | 0.456 | 0.360 | 0.341 | 0.293 | 0.163 | 0.067 | 0.048 | 2.518 | 2.613 | 2.632 | 93.94 | 97.51 | 98.22 | 96.55 | 2.29 |
| MC | G2 | 4.140 | 0.032 | 4.108 | 3.134 | 3.071 | 3.134 | 0.043 | 3.091 | 3.028 | 3.091 | 1.017 | 1.080 | 1.017 | 24.76 | 26.30 | 24.76 | 25.27 | 0.89 |
|    | G1 | 2.722 | 0.045 | 2.677 | 0.187 | 0.171 | 0.200 | 0.040 | 0.147 | 0.131 | 0.160 | 2.530 | 2.546 | 2.518 | 94.52 | 95.10 | 94.04 | 94.55 | 0.53 |
|    | B2 | 4.134 | 0.073 | 4.061 | 2.823 | 2.819 | 2.812 | 0.080 | 2.743 | 2.739 | 2.732 | 1.318 | 1.322 | 1.329 | 32.46 | 32.55 | 32.72 | 32.58 | 0.13 |
|    | B1 | 2.975 | 0.295 | 2.680 | 0.148 | 0.148 | 0.148 | 0.029 | 0.119 | 0.119 | 0.119 | 2.561 | 2.561 | 2.561 | 95.57 | 95.57 | 95.57 | 95.57 | 0.00 |
| VA | G2 | 4.140 | 0.032 | 4.108 | 2.920 | 2.858 | 2.913 | 0.052 | 2.868 | 2.806 | 2.861 | 1.240 | 1.302 | 1.247 | 30.19 | 31.69 | 30.35 | 30.74 | 0.82 |
|    | G1 | 2.722 | 0.045 | 2.677 | 0.863 | 0.767 | 0.793 | 0.044 | 0.819 | 0.723 | 0.749 | 1.858 | 1.954 | 1.928 | 69.40 | 73.00 | 72.01 | 71.47 | 1.86 |
|    | B2 | 4.134 | 0.073 | 4.061 | 2.951 | 2.998 | 2.927 | 0.072 | 2.879 | 2.926 | 2.855 | 1.182 | 1.135 | 1.207 | 29.10 | 27.95 | 29.71 | 28.92 | 0.89 |
|    | B1 | 2.975 | 0.295 | 2.680 | 0.353 | 0.339 | 0.360 | 0.295 | 0.058 | 0.044 | 0.065 | 2.622 | 2.637 | 2.615 | 97.85 | 98.38 | 97.57 | 97.93 | 0.41 |
| RA | G2 | 4.140 | 0.032 | 4.108 | 1.146 | 1.160 | 1.125 | 0.022 | 1.124 | 1.138 | 1.103 | 2.984 | 2.970 | 3.005 | 72.64 | 72.29 | 73.16 | 72.70 | 0.43 |
|    | G1 | 2.722 | 0.045 | 2.677 | 0.259 | 0.259 | 0.276 | 0.038 | 0.221 | 0.221 | 0.238 | 2.456 | 2.456 | 2.439 | 91.74 | 91.74 | 91.11 | 91.53 | 0.36 |
|    | B2 | 4.134 | 0.073 | 4.061 | 0.899 | 0.892 | 0.892 | 0.072 | 0.827 | 0.820 | 0.820 | 3.234 | 3.241 | 3.241 | 79.64 | 79.81 | 79.80 | 79.75 | 0.09 |
|    | B1 | 2.975 | 0.295 | 2.680 | 0.186 | 0.156 | 0.183 | 0.030 | 0.156 | 0.126 | 0.153 | 2.524 | 2.554 | 2.527 | 94.19 | 95.31 | 94.29 | 94.60 | 0.62 |
| R  | G2 | 4.140 | 0.032 | 4.108 | 0.159 | 0.199 | 0.169 | 0.029 | 0.130 | 0.170 | 0.140 | 3.978 | 3.938 | 3.969 | 96.83 | 95.86 | 96.60 | 96.43 | 0.51 |
|    | G1 | 2.722 | 0.045 | 2.677 | 0.047 | 0.031 | 0.031 | 0.004 | 0.042 | 0.026 | 0.026 | 2.635 | 2.651 | 2.651 | 98.43 | 99.03 | 99.03 | 98.83 | 0.35 |
|    | B2 | 4.134 | 0.073 | 4.061 | 0.038 | 0.038 | 0.038 | 0.007 | 0.031 | 0.031 | 0.031 | 4.030 | 4.030 | 4.030 | 99.24 | 99.24 | 99.24 | 99.24 | 0.00 |
|    | B1 | 2.975 | 0.295 | 2.680 | 0.110 | 0.081 | 0.081 | 0.030 | 0.080 | 0.052 | 0.052 | 2.600 | 2.628 | 2.628 | 97.02 | 98.07 | 98.07 | 97.72 | 0.61 |

### Description

1: Types of binding materials.

2: Types of aflatoxin in the test tube.

3: Amount of AF in the test tube with positive control (buffered solution spiked with solution of AF) after incubation.

4: Residual AF (as impurities) in the test tube with negative control (buffered solution without AF spiking); an average of triplicate samples.

5: Actual amount of AF recovered for positive control (3–4).

6, 7, and 8: Amount of AF in the test tube with suspension of binding material in buffer solution spiked with AF solution for triplicate samples 1, 2, and 3, respectively.

9: Residual AF (as impurities) in the test tube with suspension of binding material in buffer solution without AF spiking (blank).

10, 11, and 12: Actual amount of AF in the test tube with suspension of binding material spiked with AF solution; that is, 6–9, 7–9, and 8–9, respectively.

13, 14, and 15: Actual amount of AF bound by binding material after incubation (triplicates); that is, 5–12, 5–13, and 5–14, respectively.

16, 17, and 18: Percent adsorption capacity of the materials in binding AF in buffered solution (triplicates); that is,  $13/5 \times 100$ ,  $14/5 \times 100$ , and  $15/5 \times 100$ , respectively.

19: Average percent adsorption capacity of the binding materials in binding AF in buffered solution calculated as mean of the triplicates; that is,  $(16+17+18)/3$ .

20: Mean standard deviation of 16, 17, and 18.

AC; Arusha clay, KC; Kilimanjaro clay, CC; Coastal clay, MC; Morogoro clay, VA; Volcanic ash, RA; Rice husk ash, R; Reference binder (Mycobind<sup>®</sup>).
